# Supplementary material for: Smile Reanimation with Masseteric-to-Facial Nerve Transfer plus Cross-Face Nerve Grafting in Patients with Segmental Midface Paresis: 3D Retrospective Quantitative Evaluation
Source: MDPI journal article supplement (doi:10.3390/sym14122570), 2022-12-05
Supplement: s1 [file s1]

## **symmetry-1901996**

Supplementary material

Funny videos for spontaneous smiles

<https://youtu.be/RbGpUemSXAA>

[https://youtu.be/qcbOH\\_ZLIlo](https://youtu.be/qcbOH_ZLIlo)
